# Supplementary material
Source: publisher figshare collection journal article supplement (https://asha.figshare.com/ndownloader/files/39128291)
Supplement: Supplementary file 1 [file 39128291]

**Supplemental Material S1.** Articulation disorder status and associated speech error frequency.

| <b>Children with articulation disorders</b>                             |                                        | <b><i>n</i> (%)</b>                           |
|-------------------------------------------------------------------------|----------------------------------------|-----------------------------------------------|
| Participants with standardized single-word testing results              |                                        | 49 (87.5%)                                    |
| GFTA-3 Results:                                                         |                                        |                                               |
| Children with articulation disorders (score < 84 on GFTA-3)             |                                        | 32 (65%)                                      |
| Children with age-appropriate speech (score ≥ 85 on GFTA-3)             |                                        | 17 (35%)                                      |
| <b>Speech error frequency according to articulation disorder status</b> |                                        |                                               |
| Group                                                                   | Total errors<br><i>M</i> ( <i>SD</i> ) | Phonological errors<br><i>M</i> ( <i>SD</i> ) |
| Children with articulation disorders (score < 84 on GFTA-3)             | 21.78 (10.04)                          | 11.28 (5.81)                                  |
| Children with age-appropriate speech (score ≥ 85 on GFTA-3)             | 10.35 (6.62)                           | 5.59 (4.18)                                   |

*Note.* GFTA-3 = Goldman-Fristoe Test of Articulation–Third Edition (Goldman & Fristoe, 2015).
